# Supplementary material for: The design and characterization of a hypersensitive glucose sensor: two enzymes co-fixed on a copper phosphate skeleton
Source: Royal Society of Chemistry journal article supplement (doi:10.1039/c9tb02294e), 2019-11-25
Supplement: c9tb02294e1.pdf [file c9tb02294e1.pdf]

Electronic Supplementary Information (ESI) for Journal of Materials Chemistry B. This journal is © The Royal Society of Chemistry 2019

Electronic Supplementary Information for:

## Design and characterization of a hypersensitive glucose sensor : two enzymes co-fixed on a copper phosphate skeleton

Ye Yuan,<sup>a</sup> Zhendong Fu,<sup>a</sup> Kai Wang,<sup>a</sup> Zhenyu Zhao,<sup>a</sup> Hui Li,<sup>a</sup> Zhi Wang<sup>†abc</sup> and Liping Wang<sup>†abc</sup>

<sup>a</sup> School of Life Sciences, Jilin University, Changchun 130012, China.

<sup>b</sup> Key Laboratory for Molecular Enzymology and Engineering, the Ministry of Education, Jilin University, Changchun 130012, China.

<sup>c</sup> Engineering Laboratory for AIDS Vaccine, Jilin University, Changchun 130012, China.

\* Correspondence: wangzhi@jlu.edu.cn, wanglp@jlu.edu.cn.

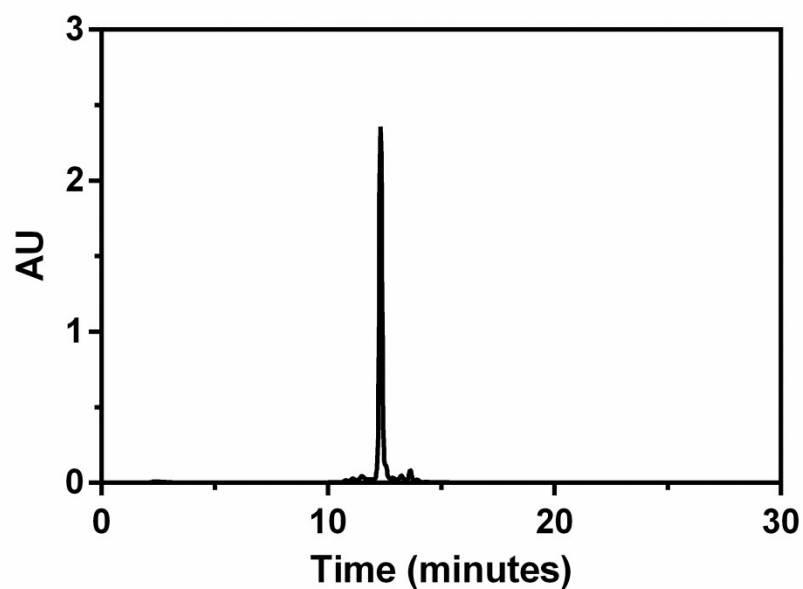

Fig. S1 RP-HPLC of DhHP-6.

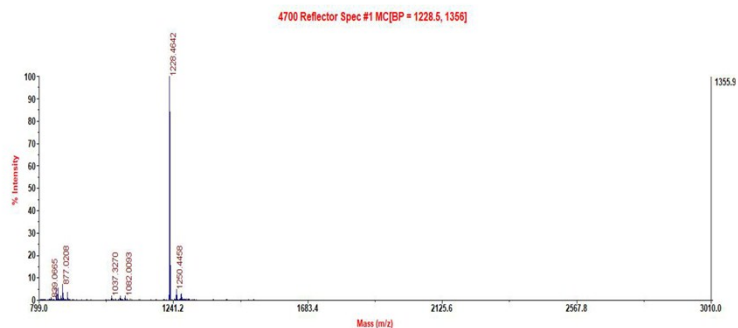

Figure. S2 TOF-MS of DhHP-6.

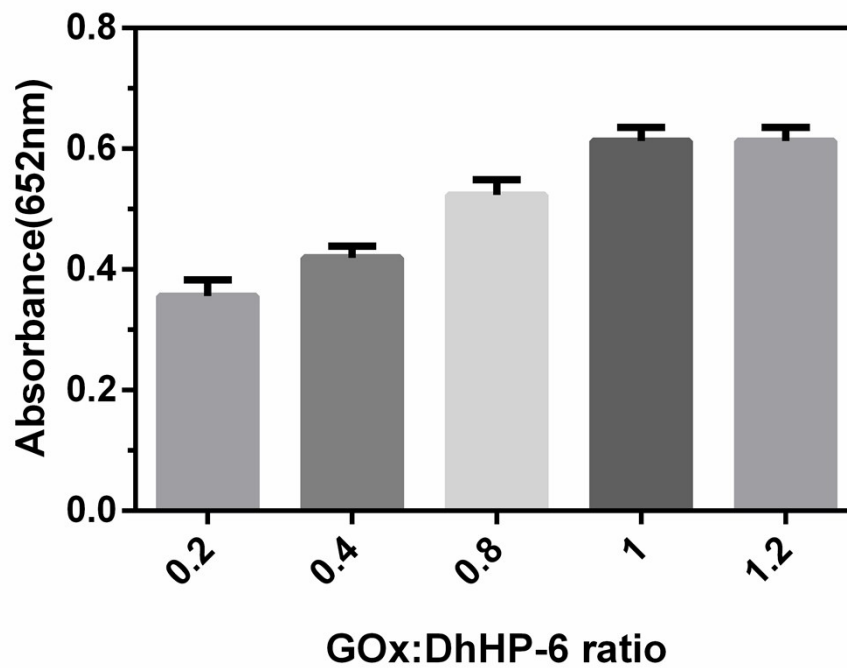

Fig. S3 Catalytic activity at different GOx:DhHP-6 ratio, in which the concentration of GOx was fixed at 1.0 mg mL<sup>-1</sup>.

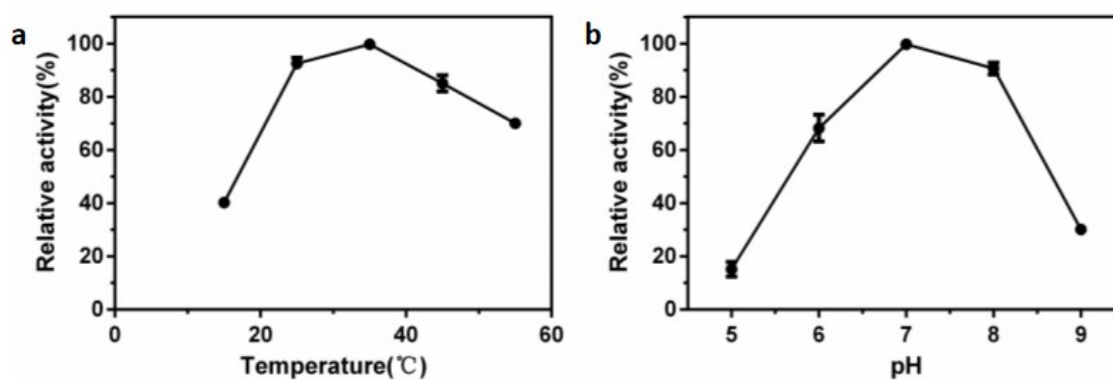

Fig. S4 Effects of (a) temperature and (b) pH on the catalytic activity of DhHP-6.

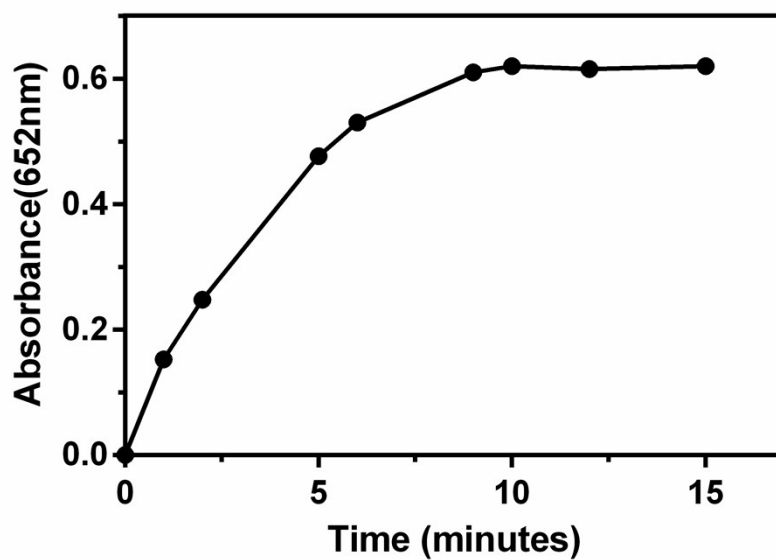

Fig. S5 Response curve against time at  $A_{652}$  in the presence of 1.0 mM TMB, 1.0 mM glucose and GOx&DhHP-6- $\text{Cu}_3(\text{PO}_4)_2$  for 0-15 min.
